# Supplementary material
Source: PubMed Central journal article supplement (PMC8092505)
Supplement: AAC.02143-20-s0001.pdf [file AAC.02143-20-s0001.pdf]

**Supplemental Methods:**

***Immunofluorescence Imaging.*** The cells were fixed with 4% formaldehyde/0.0075% glutaraldehyde using the method of Tonkin *et al.* (1) PfDHODH was detected with a 1:300 dilution of mouse anti-PfDHODH antibody (a kind gift from Margeret Phillips, University of Texas Southwestern) followed by secondary antibody Alexaflour-488 goat anti-mouse (Molecular Probes) diluted to 1:250. Cells were further stained with 1.5 µg/ml DAPI (Molecular Probes) to stain parasite nuclei, resuspended in Slowfade Antifade reagent (Molecular Probes), and mounted on slides using Flouromount-GTM (Southern Biotech, Birmingham, AL, USA). Images were obtained using an Olympus BX61 system and SlideBook 6.0 (Intelligent Imaging Innovations).

***Comparative Genomic Hybridization:*** Genomic DNA from *Plasmodium falciparum* cultures D6 and SB1-A6 were collected and purified using the DNeasy kit (Qiagen). A Covaris LE220 was then used to shear gDNA to 1-5kb fragments. Sheared DNA was purified using a Zymo DNA Clean and Concentrator-5 kit and size was verified on a 1% agarose gel. Sheared DNA was primed with a random nonamer at 99°C for 5 minutes and cooled on ice for 5 minutes. Each sample was then mixed with 5ul NEB Buffer 2, 5ul 15x dNTP mix (2:1:1:1, A:T:C:G), 4ul Klenow Fragment (NEB, Cat #M0212S ), and the volume was brought up to 50ul with water. Samples were moved to an ozone-free facility and 1.5ul of dUTP-Cy3 or dUTP-Cy5 (Enzo, Cat #ENZ-42501 and #ENZ-42502) was added. A two-hour incubation proceeded in a 37°C heat block, protected from light. Following Klenow treatment, samples were purified using a Zymo DNA Clean and Concentrator-5 kit. Equal nanograms of each sample were hybridized on custom 8x15K microarrays from Agilent Technologies (AMADID 032491, GEO Platform GPL17880) as detailed in Kafsack *et al.*, 2012 (2).

**Table S1:**

| Inhibitor                             | D6           | SB1-A6                | D6 C276F     | SB1-A6 F276C |
|---------------------------------------|--------------|-----------------------|--------------|--------------|
| 6-NH <sub>2</sub> Ac (nM)             | 1.55 ± 0.03  | >4,500 (4472 ± 20.67) | 46.18 ± 0.29 | 547.3 ± 0.29 |
| 6-NH <sub>2</sub> Ac + Proguanil (nM) | 0.42 ± 0.28  | 257.5 ± 0.29          | 30.16 ± 0.31 | 170.3 ± 0.18 |
| Atovaquone (nM)                       | 0.10 ± 0.19  | >1,500 (9891 ± 0.43)  | 0.28 ± 0.12  | 25.91 ± 0.62 |
| Atovaquone + Proguanil (nM)           | 0.08 ± 0.12  | 29.82 ± 0.28          | 0.15 ± 0.06  | 0.81 ± 0.02  |
| DSM-1 (μM)                            | 0.66 ± 0.06  | 412.2 ± 0.24          | 6.76 ± 0.11  | 10.90 ± 0.12 |
| DSM-1 + Proguanil (μM)                | 0.71 ± 0.15  | 191.7 ± 0.13          | 6.99 ± 0.12  | 4.84 ± 0.09  |
| ELQ-300 (nM)                          | 20.69 ± 0.15 | >4,500 (24492 ± 0.53) | 102.7 ± 0.13 | 749.8 ± 0.13 |
| ELQ-300 + Proguanil (nM)              | 4.64 ± 0.19  | 480.8 ± 0.17          | 51.09 ± 0.16 | 61.10 ± 0.17 |
| DSM-265 (nM)                          | 9.01 ± 0.04  | >4,500 (4477 ± 36)    | 592.7 ± 0.12 | 62.17 ± 0.16 |
| Chloroquine (nM)                      | 6.59 ± 0.05  | 7.39 ± 0.07           | 7.06 ± 0.12  | 7.21 ± 0.11  |

**Table S1: Drug susceptibility of various parasite lines:** Early ring-stage *P. falciparum* strains D6, SB1-A6, and the CRISPR mutant lines D6<sup>C276F</sup> and SB1-A6<sup>F276C</sup> were evaluated for their susceptibility to the listed mtETC and *Pf*DHODH inhibitors with or without the addition of 1.5 μM proguanil. Chloroquine was included as a positive control for the accurate capture of parasite susceptibility. Parasite survival was determined using a traditional 48 h SYBR-green growth inhibition assay (3) and the IC50 was calculated as an average of three technical replicates (±SD) using GraphPad 8.

**Figure S1:**

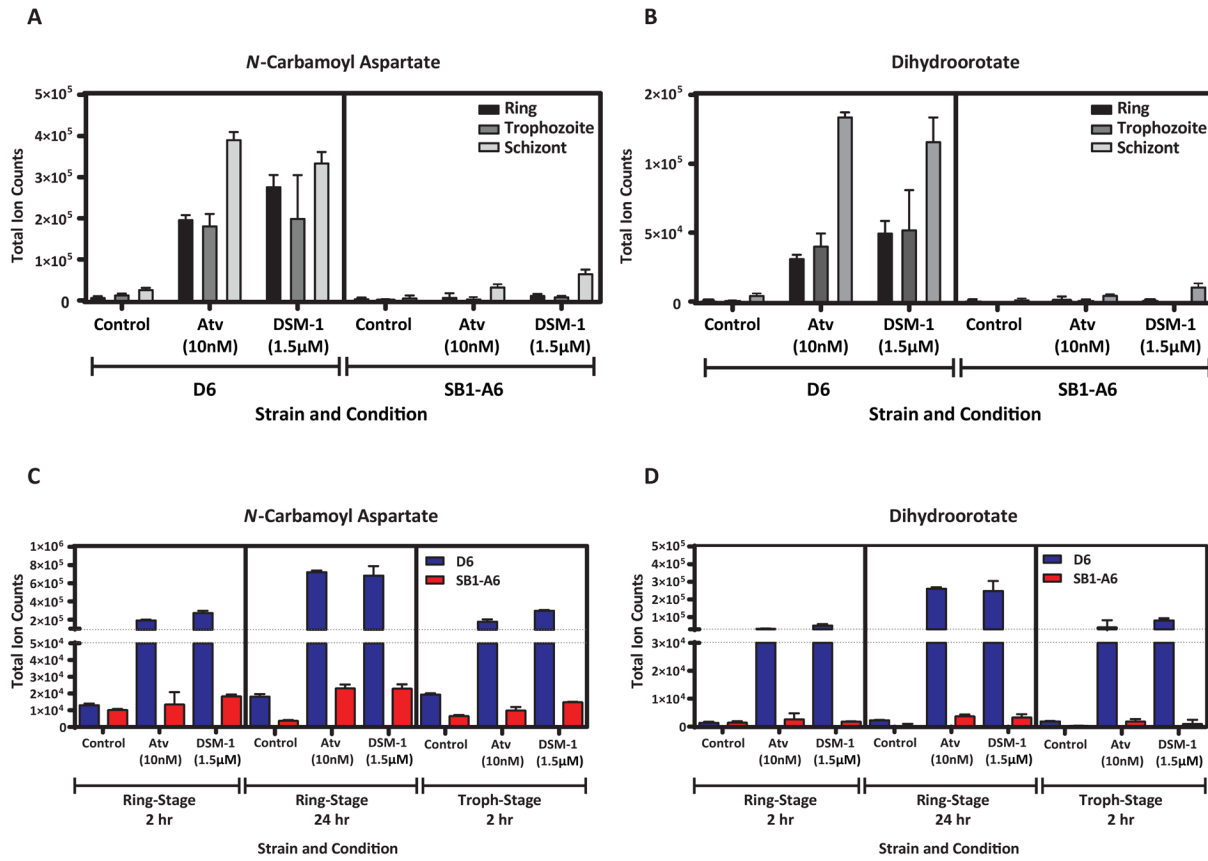

**Figure S1: Effects of Inhibitors on pyrimidine synthesis precursors in both sensitive and resistant *P. falciparum*.** Flux through *de novo* pyrimidine synthesis was measured in synchronous treated and untreated parasite strains D6 and SB1-A6 by LC-MS. The total ion counts of *N*-carbamoyl aspartate (A) and dihydroorotate (B) were determined at the ring, trophozoite, and schizont stages after two hours of atovaquone (Atv) or DSM-1 exposure at 10x IC<sub>50</sub>. Similarly, *de novo* pyrimidine synthesis flux was captured after a prolonged 24 h hour exposure to either atovaquone or DSM-1 at 10x IC<sub>50</sub>, and the total ion counts of *N*-carbamoyl aspartate (C) and dihydroorotate (D) are plotted in comparison to short drug exposures at both ring and trophozoite stages.

**Table S2:**

| Chromosome  | Location | GeneID        | Description                                                   | Mutation                                                        |
|-------------|----------|---------------|---------------------------------------------------------------|-----------------------------------------------------------------|
| Pf3D7_11_v3 | 1811743  | PF3D7_1145600 | conserved Plasmodium protein;<br>unknown function             | NON_SYNONYMOUS_CODING<br>(MODERATE MISSENSE Gac/Tac D234Y 629   |
| Pf3D7_14_v3 | 1121885  | PF3D7_1428500 | protein kinase, putative                                      | NON_SYNONYMOUS_CODING<br>(MODERATE MISSENSE Gat/Cat D1003H 2353 |
| Pf3D7_06_v3 | 131212   | PF3D7_0603300 | dihydroorotate dehydrogenase,<br>mitochondrial precursor      | NON_SYNONYMOUS_CODING<br>(MODERATE MISSENSE tGt/tTt C276F 569   |
| Pf3D7_04_v3 | 676195   | PF3D7_0415200 | conserved Plasmodium protein,<br>unknown function             | STOP_GAINED<br>(HIGH NONSENSE Gag/Tag E982* 2212                |
| Pf3D7_02_v3 | 507561   | PF3D7_0212400 | conserved Plasmodium protein,<br>unknown function             | NON_SYNONYMOUS_CODING<br>(MODERATE MISSENSE gaG/gaC E98D 4091   |
| Pf3D7_14_v3 | 2588161  | PF3D7_1463900 | conserved Plasmodium<br>membrane protein, unknown<br>function | NON_SYNONYMOUS_CODING<br>(MODERATE MISSENSE aTa/aAa I510K 1071  |

**Table S2: SNP analysis of the *P.f.* SB1-A6 genome.** The genomes of both the wild-type *P.f.* strain D6 and drug-resistant strain SB1-A6 we examined via Illumina next-generation whole-genome sequencing. SNPs were identified using SNP effector (v 4.3T) (4) and the location of those identified in only *P.f.* SB1-A6 are listed as well as the associated gene and resultant mutation.

**Table S3:**

| Gene ID       | Old Gene ID | Probe Name         | Description                                    | Log <sub>2</sub> (D6/SB1-A6) |
|---------------|-------------|--------------------|------------------------------------------------|------------------------------|
| PF3D7_0602700 | PFF0130c    | PFF0130C_V7.1_P2/2 | conserved Plasmodium protein, unknown function | -0.88                        |
|               |             | PFF0130C_V7.1_P1/2 | conserved Plasmodium protein, unknown function | -1.19                        |
| PF3D7_0602800 | PFF0135w    | PFF0135W_V7.1_P2/2 | JmjC domain containing protein                 | -0.91                        |
|               |             | PFF0135W_V7.1_P1/2 | JmjC domain containing protein                 | -1.18                        |
| PF3D7_0602900 | PFF0140c    | PFF0140C_V7.1_P2/2 | conserved Plasmodium protein, unknown function | -0.67                        |
|               |             | PFF0140C_V7.1_P1/2 | conserved Plasmodium protein, unknown function | -0.96                        |
| PF3D7_0603000 | PFF0145w    | PFF0145W_V7.1_P2/2 | SDE2 domain-containing protein, putative       | -0.52                        |
|               |             | PFF0145W_V7.1_P1/2 | SDE2 domain-containing protein, putative       | -0.82                        |
| PF3D7_0603100 | PFF0150c    | PFF0150C_V7.1_P2/2 | RNA-binding protein, putative                  | -0.60                        |
|               |             | PFF0150C_V7.1_P1/2 | RNA-binding protein, putative                  | -1.13                        |
| PF3D7_0603200 | PFF0155w    | PFF0155W_V7.1_P2/2 | mitochondrial chaperone BCS1, putative         | -0.84                        |
|               |             | PFF0155W_V7.1_P1/2 | mitochondrial chaperone BCS1, putative         | -1.03                        |
| PF3D7_0603300 | PFF0160c    | PFF0160c_V7.1_P2/2 | dihydroorotate dehydrogenase                   | -0.91                        |
|               |             | PFF0160c_V7.1_P1/2 | dihydroorotate dehydrogenase                   | -1.12                        |

**Table S3: Copy number analysis of *P.f.* SB1-A6.** Genome-wide copy number changes were captured for both *P.f.* strains D6 (Cy3) and SB1-A6 (Cy5) by comparative genomic hybridization using DNA microarray analysis. Fold changes in copy numbers were determined by calculating the fold change (D6/SB1-A6) signal intensity (Log<sub>2</sub>). Genes are their corresponding DNA microarray probes with an absolute fold change >5 are represented.

**Figure S2:**

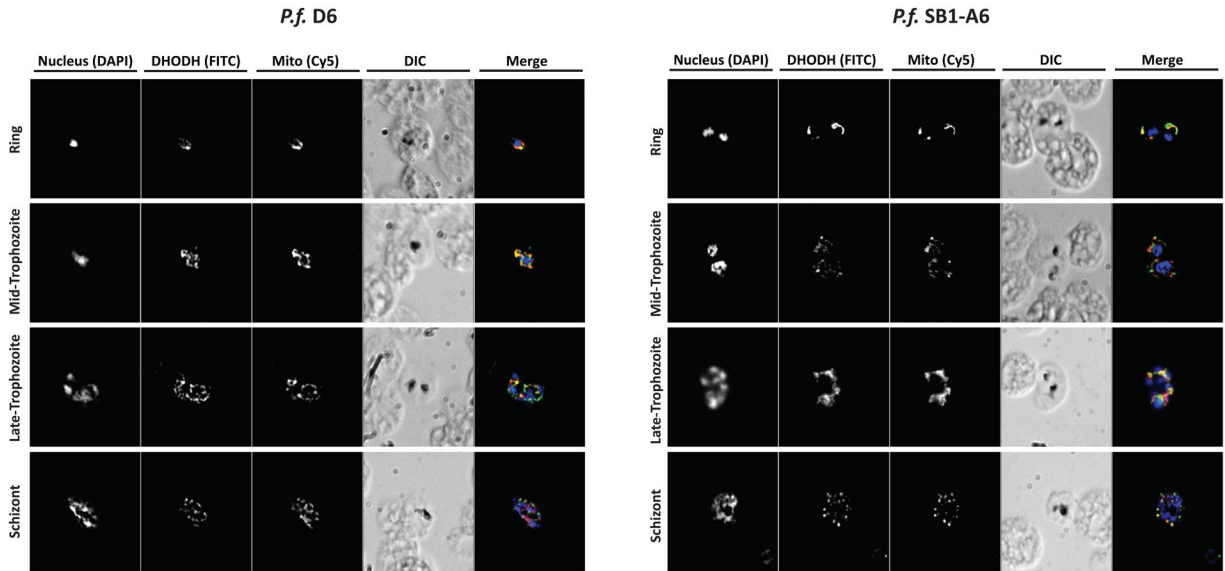

**Figure S2: Immunofluorescent Imaging Analysis of *Pf*DHODH localization in both wild-type and drug-resistant parasite strains.** Expression and localization of *Pf*DHODH (FITC) to the mitochondrion (Cy5) was visualized by immunofluorescent microscopy; (blue) nuclear DNA stained with DAPI.

Figure S3:

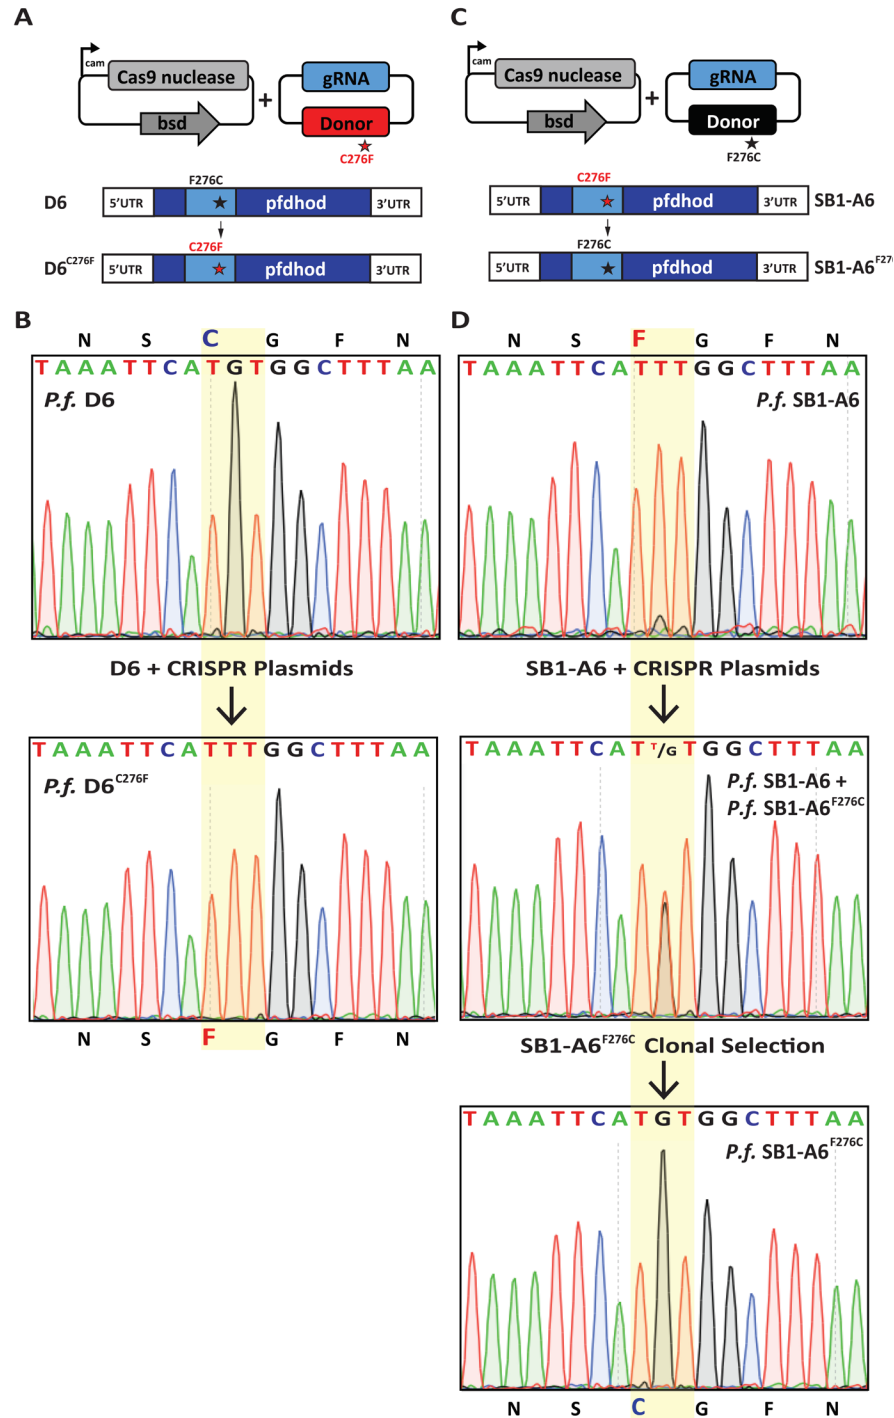

**Figure S3: CRISPR-Cas9 editing of *PfdhodH*.** A) Schematic representation of CRISPR-Cas9 mutation strategies for *PfdhodH* B) DNA sequence chromatogram showing successful mutations of *PfdhodH* at nucleotide 827 in both C) D6 and D) SB1-A6. The motifs are highlighted in yellow and the PAM is highlighted in green. Mutated nucleotides are underlined.

### Supplemental References:

1. Tonkin CJ, van Dooren GG, Spurck TP, Struck NS, Good RT, Handman E, Cowman AF, McFadden GI. 2004. Localization of organellar proteins in *Plasmodium falciparum* using a novel set of transfection vectors and a new immunofluorescence fixation method. *Mol Biochem Parasitol* 137:13-21.
2. Kafsack BF, Painter HJ, Llinas M. 2012. New Agilent platform DNA microarrays for transcriptome analysis of *Plasmodium falciparum* and *Plasmodium berghei* for the malaria research community. *Malaria Journal* 11:187.
3. Smilkstein M, Sriwilaijaroen N, Kelly JX, Wilairat P, Riscoe M. 2004. Simple and inexpensive fluorescence-based technique for high-throughput antimalarial drug screening. *Antimicrobial Agents and Chemotherapy* 48:1803-6.
4. Cingolani P, Platts A, Wang le L, Coon M, Nguyen T, Wang L, Land SJ, Lu X, Ruden DM. 2012. A program for annotating and predicting the effects of single nucleotide polymorphisms, SnpEff: SNPs in the genome of *Drosophila melanogaster* strain w1118; iso-2; iso-3. *Fly (Austin)* 6:80-92.
